# Supplementary material for: Pelvic incidence and hip disorders: A systematic review and quantitative analysis
Source: PubMed Central journal article supplement — Acta Orthop. 2017 Sep 15;89(1):66–70. doi: 10.1080/17453674.2017.1377017 (PMC5810835; doi:10.1080/17453674.2017.1377017), 2017-09-15
Supplement: IORT_A_1377017_SM8528.pdf [file IORT_A_1377017_SM8528.pdf]

## Supplementary data

Table 1. Search strategy

| Database | Search classes and limiters                                                                                                                      |
|----------|--------------------------------------------------------------------------------------------------------------------------------------------------|
| PUBMED   | "pelvic incidence" AND ("Hip"[Mesh] OR hip [tiab] OR cox* [tiab] OR femur* [tiab] OR femor* [tiab] OR *acetabul* [tiab]) AND has abstract [text] |
| CENTRAL  | ("pelvic incidence") and ([mh hip] or hip:ti or cox*:ti or femur*:ti or femor*:ti or acetabul*:ti)                                               |
| SCOPUS   | (ALL ("pelvic incidence")) AND (TITLE-ABS-KEY(hip OR cox* OR femur* OR femor* OR *acetabul*)) AND (LIMIT-TO(DOCTYPE,"ar" ))                      |
| CINAHL   | ("pelvic incidence") AND ((MH Hip) OR (TI hip) OR (TI cox*) OR (TI femur*) OR (TI *femor*) OR (TI acetabul*))                                    |

Table 2. Demographic characteristics of the included studies

| Study/Country                                   | Design <sup>a</sup> | Reference if available | Radiographic methods                               | Inclusion/exclusion criteria                                                                                                                                                                                                                                                                                                                                                                                                    |
|-------------------------------------------------|---------------------|------------------------|----------------------------------------------------|---------------------------------------------------------------------------------------------------------------------------------------------------------------------------------------------------------------------------------------------------------------------------------------------------------------------------------------------------------------------------------------------------------------------------------|
| <b>Hip osteoarthritis</b>                       |                     |                        |                                                    |                                                                                                                                                                                                                                                                                                                                                                                                                                 |
| Bendaya et al. 2015<br>France/Canada            | C-S                 | Healthy                | Standing radiography EOS and 3D reconstruction     | Including (osteoarthritis): isolated coxarthrosis.<br>Excluding (osteoarthritis): arthroplasty in lower limb<br>Excluding (healthy): coxarthrosis; previous arthroplasty; associated disorders in spine, knee, or ankle                                                                                                                                                                                                         |
| Blondel et al. 2009<br>France                   | F-U                 | None                   | Standing radiography                               | Including: Primary unilateral coxarthrosis.<br>Excluding: previous arthroplasty or spinal arthrosis                                                                                                                                                                                                                                                                                                                             |
| Bredow et al. 2015<br>Germany                   | F-U                 | None                   | Standing radiography EOS                           | Excluding: previous lumbar spine or hip surgery; coxarthrosis grade > 5; fracture; systemic or local infection; malignancy; chemotherapy; severe osteoporosis or spinal degeneration                                                                                                                                                                                                                                            |
| Eyvazov et al. 2016<br>Turkey                   | F-U                 | None                   | Standing radiography                               | Including: coxarthrosis with significant low back pain.<br>Excluding: spinal and/or lower extremity deformities; spinal surgery or fractures in lower limbs; radicular pain; spinal stenosis; and neurologic disorders affecting postural control                                                                                                                                                                               |
| Ochi et al. 2016<br>Japan                       | C-S                 | None                   | Standing and sitting radiography                   | Excluding: hip surgery; spinal compression fracture; ankylosing spondylitis; major contralateral hip contracture; and neurologic or musculoskeletal disorder affecting pelvic alignment                                                                                                                                                                                                                                         |
| Ochi et al. 2017<br>Japan                       | F-U                 | None                   | Standing radiography                               | Excluding: previous hip surgery; femoral head osteonecrosis; previous spine surgery; ankylosing spondylitis; rheumatoid arthritis; neurologic or musculoskeletal disorders affecting pelvic alignment; vertebral compression fracture; limitations of activities due to moderate or severe pain after surgery                                                                                                                   |
| Sariali et al. 2009<br>France                   | F-U                 | Healthy                | Standing and sitting radiography                   | Excluding: spinal or lower extremity disorders                                                                                                                                                                                                                                                                                                                                                                                  |
| Weng et al. 2016<br>China                       | F-U                 | Healthy                | Standing radiography                               | Excluding: other osteoarthritis or arthritis; dysplasia; surgery in spine, hip, or leg; neurologic deficit in leg; other diseases affecting sagittal alignment; index hip; severe osteophytes; vertebral compression; spondylolisthesis; and scoliosis.<br>Healthy controls: 40–70 years of age; no spinal pathology or deformity; no hip, pelvic, or lower limb disorders; no pain in the low back or hip in previous 3 months |
| Weng et al. 2015<br>China                       | C-S                 | Healthy                | Standing radiography                               |                                                                                                                                                                                                                                                                                                                                                                                                                                 |
| Yoshimoto et al. 2005<br>Japan                  | C-S                 | Low back pain          | Lateral radiography                                | Excluding: rheumatoid arthritis; aseptic necrosis of femoral head; hip fracture; femoral head deformity; infection; malignancy; severe hip subluxation and dislocation; and acetabular and/or femoral osteotomy                                                                                                                                                                                                                 |
| <b>Ankylosing spondylitis</b>                   |                     |                        |                                                    |                                                                                                                                                                                                                                                                                                                                                                                                                                 |
| Gao et al. 2015<br>China                        | F-U                 | None                   | Standing radiography                               | Excluding: previous spine or joint surgery; neoplasm; serious general disorders; pregnancy                                                                                                                                                                                                                                                                                                                                      |
| Gu et al. 2015<br>China                         | F-U                 | None                   | Standing radiography                               | Not defined                                                                                                                                                                                                                                                                                                                                                                                                                     |
| <b>Femoroacetabular impingement (FAI)</b>       |                     |                        |                                                    |                                                                                                                                                                                                                                                                                                                                                                                                                                 |
| Hellman et al. 2017<br>USA                      | C-S                 | Healthy <sup>b</sup>   | Standing radiography and computed tomography       | Excluding: coxarthrosis or childhood hip pathology                                                                                                                                                                                                                                                                                                                                                                              |
| Weinberg et al. 2016<br>USA                     | C-S                 | Healthy                | Computed tomography and magnetic resonance imaging | Including: history, physical exam, and imaging were consistent with hip impingement. Excluding: spine, hip, or femur trauma; hip or spine surgery; and spondylolisthesis                                                                                                                                                                                                                                                        |
| <b>Subchondral insufficiency fracture (SIF)</b> |                     |                        |                                                    |                                                                                                                                                                                                                                                                                                                                                                                                                                 |
| Jo et al. 2016<br>South Korea                   | C-S                 | Matched healthy        | Lateral radiography and magnetic resonance imaging | Excluding: age < 50 years; osteonecrosis in any other joint; transplanted organs; alcohol abuse; and steroid use                                                                                                                                                                                                                                                                                                                |

<sup>a</sup> C-S: Cross-sectional; F-U: Follow-up after hip replacement.

<sup>b</sup> Extracted from the study by Viale et al. 2005.

Table 3. Main relevant results of the included studies

| Study                                           | Sample size | Gender (% women) | Age, mean (SD)           | Mean pelvic incidence estimates (SD), ° | Authors' comments and conclusions relevant to this review                                                                                                                                                                                      |
|-------------------------------------------------|-------------|------------------|--------------------------|-----------------------------------------|------------------------------------------------------------------------------------------------------------------------------------------------------------------------------------------------------------------------------------------------|
| <b>Hip osteoarthritis</b>                       |             |                  |                          |                                         |                                                                                                                                                                                                                                                |
| Bendaya et al. 2015                             |             |                  |                          |                                         |                                                                                                                                                                                                                                                |
| Coxarthrosis:                                   | 30          | 60               | 59.5 (15.6)              | 56.3 (11.5)                             | Pelvic incidence may have been underpowered. Contrary to the classical description, the difference in sacral slope relates more to a difference in the geometric parameter of pelvic incidence than to the functional parameter of pelvic tilt |
| Healthy:                                        | 30          | 47               | 46.0 (12.4)              | 52.1 (11.9)                             |                                                                                                                                                                                                                                                |
| Blondel et al. 2009                             | 50          | 48               | 64.0 (47–81)             | 56 (40–87)                              | None                                                                                                                                                                                                                                           |
| Bredow et al. 2015                              | 20          | 40               | 64.1 (14.4) <sup>a</sup> | 53.9 (13.1)                             | The initial PI of a few patients was above average but the small sample size limited the results                                                                                                                                               |
| Eyvazov et al. 2016                             | 28          | 61               | 61.7 (6.4)               | 50 (35–60)                              | None                                                                                                                                                                                                                                           |
| Ochi et al. 2016                                | 74          | 81               | 65.5 (13.4) <sup>b</sup> | 54.7 (13.6)                             | Nonsignificant results regarding the role of pelvic incidence                                                                                                                                                                                  |
| Ochi et al. 2017                                | 92          | 84               | 67.5 (10.1)              | 51.2 (11.2)                             | Patients with larger pelvic incidence had poorer clinical outcomes                                                                                                                                                                             |
| Sariali et al. 2009                             |             |                  |                          |                                         | None                                                                                                                                                                                                                                           |
| Coxarthrosis                                    | 89          | 58               | 58.2 (2.0)               | 51.7 (5.0)                              |                                                                                                                                                                                                                                                |
| Healthy                                         | 100         | 45               | 51.0 (10.0)              | 52.7 (9.0)                              |                                                                                                                                                                                                                                                |
| Weng et al. 2016                                |             |                  |                          |                                         | None                                                                                                                                                                                                                                           |
| Coxarthrosis                                    | 69          | 64               | 62.7 (9.9)               | 49.3 (11.1)                             |                                                                                                                                                                                                                                                |
| Healthy                                         | 64          | 64               | 58.0 (10.6)              | 46.3 (9.3)                              |                                                                                                                                                                                                                                                |
| Weng et al. 2015 <sup>f</sup>                   |             |                  |                          |                                         | Pelvic incidence might not be involved in coxarthrosis                                                                                                                                                                                         |
| Coxarthrosis                                    | 58          | 64               | 59.0 (11.9)              | 49.0 (10.8)                             |                                                                                                                                                                                                                                                |
| Healthy                                         | 64          | 64               | 58.0 (10.6)              | 46.3 (9.3)                              |                                                                                                                                                                                                                                                |
| Yoshimoto et al. 2005                           |             |                  |                          |                                         | Higher pelvic incidence in young age may contribute to the development of coxarthrosis                                                                                                                                                         |
| Coxarthrosis                                    | 150         | 80               | 61.1 (11.1)              | 58.5 (14.0) <sup>c</sup>                |                                                                                                                                                                                                                                                |
| Low back pain                                   | 150         | 80               | 58.9 (11.7)              | 51.9 (13.4) <sup>c</sup>                |                                                                                                                                                                                                                                                |
| <b>Ankylosing spondylitis</b>                   |             |                  |                          |                                         |                                                                                                                                                                                                                                                |
| Gao et al. 2015                                 | 58          | 6                | 32.7 (3.1) <sup>d</sup>  | 50.0 (4.4)                              | Pelvic incident angle may correlate with life quality, body pain, vitality, and emotional role in patients with ankylosing spondylitis                                                                                                         |
| Gu et al. 2015                                  | 29          | 0                | 37.7 (9.24)              | (53.5–82.0)                             | None                                                                                                                                                                                                                                           |
| <b>Femoroacetabular impingement (FAI)</b>       |             |                  |                          |                                         |                                                                                                                                                                                                                                                |
| Hellman et al. 2017                             |             |                  |                          |                                         | Lower pelvic incidence in patients with FAI than in general population                                                                                                                                                                         |
| FAI                                             | 60          | 50               | 35.4 (12.0) <sup>e</sup> | 49.3 (12.3)                             |                                                                                                                                                                                                                                                |
| Healthy                                         | 300         | 37               | 32.6 (9.3) <sup>e</sup>  | 55.0 (10.6)                             |                                                                                                                                                                                                                                                |
|                                                 |             |                  | Historical controls      |                                         |                                                                                                                                                                                                                                                |
| Weinberg et al. 2016                            |             |                  |                          |                                         | Mixed-type FAI may develop as a response to decreased pelvic incidence. Pelvic incidence figures did not differ from the healthy group in Cam and retroverted types                                                                            |
| Cam type                                        | 21          |                  |                          | 50.8 (4.6)                              |                                                                                                                                                                                                                                                |
| Retroverted type                                | 19          |                  |                          | 51.0 (4.6)                              |                                                                                                                                                                                                                                                |
| Mixed type                                      | 25          |                  |                          | 46.7 (3.7)                              |                                                                                                                                                                                                                                                |
| Healthy                                         | 27          |                  |                          | 56.1 (4.4)                              |                                                                                                                                                                                                                                                |
| All together:                                   |             | 48               | 34.0 (3.0)               |                                         |                                                                                                                                                                                                                                                |
| <b>Subchondral insufficiency fracture (SIF)</b> |             |                  |                          |                                         |                                                                                                                                                                                                                                                |
| Jo et al. 2016                                  |             |                  |                          |                                         | None                                                                                                                                                                                                                                           |
| SIF                                             | 37          | 89               | 70.5 (7.4)               | 54.3 (12.2)                             |                                                                                                                                                                                                                                                |
| Healthy                                         | 37          | 89               | 70.7 (5.2)               | 55.4 (8.3)                              |                                                                                                                                                                                                                                                |

<sup>a</sup> Exceptionally wide range 26 to 91 years;

<sup>b</sup> Exceptionally wide range 27 to 86 years;

<sup>c</sup> Exceptionally wide range 29 to 90 for coxarthrosis and 25 to 85 degrees for low back pain;

<sup>d</sup> Figures are reported for the final sample size (n = 47) excluding one patient;

<sup>e</sup> Exceptionally wide range 20 to 70 (FAI) and 18 to 53 (healthy) years;

<sup>f</sup> Subgroup of the study by Weng et al. 2016.

Table 4. Pelvic incidence estimates reported by the included studies and their pooled figures along with those for an asymptomatic population

| Study                                           | n   | % Women | Age  | SD               | Mean | SD                | 95% CI    |
|-------------------------------------------------|-----|---------|------|------------------|------|-------------------|-----------|
| <b>Coxarthrosis</b>                             |     |         |      |                  |      |                   |           |
| Bendaya et al. 2015                             | 30  | 60      | 59.5 | 15.6             | 56.3 | 11.5              | 52.2–60.4 |
| Blondel et al. 2009                             | 50  | 48      | 64.0 | 8.5 <sup>a</sup> | 56.0 | 11.8 <sup>b</sup> | 52.7–59.3 |
| Bredow et al. 2015                              | 20  | 40      | 64.1 | 14.4             | 53.9 | 13.1              | 48.2–59.6 |
| Eyvazov et al. 2016                             | 28  | 61      | 61.7 | 6.4              | 50.0 | 6.3 <sup>b</sup>  | 47.7–52.3 |
| Ochi et al. 2016                                | 74  | 81      | 65.5 | 13.4             | 54.7 | 13.6              | 51.6–57.8 |
| Ochi et al. 2017                                | 92  | 84      | 67.5 | 10.1             | 51.2 | 11.2              | 48.9–53.5 |
| Sariali et al. 2009                             | 89  | 58      | 58.2 | 2.0              | 51.7 | 5.0               | 50.7–52.7 |
| Weng et al. 2016b                               | 69  | 64      | 62.7 | 9.9              | 49.3 | 11.1              | 46.7–51.9 |
| Yoshimoto et al. 2005                           | 150 | 80      | 61.1 | 11.1             | 58.5 | 14.0              | 56.3–60.7 |
| Pooled estimates                                | 602 | 70      | 62.7 | 10.1             | 54.0 | 10.5              | 53.2–54.8 |
| <b>Ankylosing spondylitis<sup>c</sup></b>       |     |         |      |                  |      |                   |           |
| Gao et al. 2015                                 | 58  | 6       | 32.7 | 3.1              | 50.0 | 4.4               | 48.9–51.1 |
| <b>Femoroacetabular impingement (FAI)</b>       |     |         |      |                  |      |                   |           |
| Hellman et al. 2017                             | 60  | 50      | 49.3 | 12.3             | 49.3 | 12.3              | 46.2–52.4 |
| Weinberg et al. 2016                            |     |         |      |                  |      |                   |           |
| Cam type                                        | 21  | 43      | 34.0 | 5.0              | 50.8 | 4.6               | 48.8–52.8 |
| Retroverted type                                | 19  | 53      | 36.0 | 7.0              | 51.0 | 4.6               | 48.9–53.1 |
| Mixed type                                      | 25  | 48      | 34.0 | 3.0              | 46.7 | 3.7               | 45.2–48.2 |
| <b>Subchondral insufficiency fracture (SIF)</b> |     |         |      |                  |      |                   |           |
| Jo et al. 2016                                  | 37  | 89      | 70.5 | 7.4              | 54.3 | 12.2              | 50.4–58.2 |
| <b>Asymptomatic samples</b>                     |     |         |      |                  |      |                   |           |
| Jo et al. 2016                                  | 37  | 89      | 70.7 | 5.2              | 55.4 | 8.3               | 52.7–58.1 |
| Legaye et al. 1998                              | 49  | 43      | 24.0 | 5.8              | 53.2 | 10.3              | 50.3–56.1 |
| Legaye et al. 2009                              | 40  | 58      | 44.0 | 17.0             | 50.0 | 12.0              | 46.3–53.7 |
| Roussouly et al. 2005                           | 160 | 54      | 27.0 | 7.5 <sup>b</sup> | 51.9 | 10.7              | 50.3–53.6 |
| Sariali et al. 2009                             | 100 | 45      | 51.0 | 10.0             | 52.7 | 9.0               | 50.9–54.5 |
| Vialle et al. 2005                              | 300 | 37      | 35.4 | 12.0             | 54.7 | 10.6              | 53.5–55.9 |
| Weng et al. 015                                 | 64  | 64      | 58.0 | 10.6             | 46.3 | 9.3               | 44.0–48.6 |
| Weinberg et al. 2016                            | 27  | 48      | 33.0 | 5.0              | 56.1 | 4.4               | 54.4–57.8 |
| Pooled estimates                                | 777 | 46      | 38.9 | 10.4             | 52.9 | 10.1              | 52.2–53.6 |

<sup>a</sup> Calculated from reported range as SD = (maximum – minimum)/4;

<sup>b</sup> Study by Weng et al. 2015 removed as a subset of the study by Weng et al. 2016;

<sup>c</sup> Study by Gu et al. 2015 was dropped out from the quantitative analysis—no mean pelvic incidence was reported.
